1           **A new contact killing toxin permeabilizes cells and belongs to a large protein family**

2

3

4           Cristian V. Crisan<sup>1,2,3</sup>, Harshini Chandrashekar<sup>4</sup>, Catherine Everly<sup>1,2,3</sup>, Gabi Steinbach<sup>3,5</sup>,  
5           Shannon E. Hill<sup>2,6</sup>, Peter J. Yunker<sup>3,5</sup>, Raquel R. Lieberman<sup>2,6</sup>, Brian K. Hammer<sup>1,2,3</sup> \*

6

7

8           <sup>1</sup> School of Biological Sciences, Georgia Institute of Technology, Atlanta, Georgia, USA

9           <sup>2</sup> Parker H. Petit Institute for Bioengineering & Bioscience, Georgia Institute of Technology,  
10          Atlanta, Georgia, USA

11          <sup>3</sup> Center for Microbial Diseases and Infection, Georgia Institute of Technology, Atlanta, Georgia,  
12          USA

13          <sup>4</sup> Department of Bioengineering, University of Pennsylvania, Philadelphia, USA

14          <sup>5</sup> School of Physics, Georgia Institute of Technology, Atlanta, Georgia, USA

15          <sup>6</sup> School of Chemistry and Biochemistry, Georgia Institute of Technology, Atlanta, Georgia,  
16          USA

17          \*Corresponding author: [brian.hammer@biology.gatech.edu](mailto:brian.hammer@biology.gatech.edu)

18

19

20

21

22

23

24

25

26

27

28

29

30

## 31 ABSTRACT

32 *Vibrio cholerae* is an aquatic Gram-negative bacterium that causes severe diarrheal cholera disease  
33 when ingested by humans. To eliminate competitor cells in both the external environment and  
34 inside hosts, *V. cholerae* uses the Type VI Secretion System (T6SS). The T6SS is a  
35 macromolecular weapon employed by many Gram-negative bacteria to deliver cytotoxic proteins  
36 into adjacent cells. In addition to canonical T6SS gene clusters encoded by all sequenced *V.*  
37 *cholerae* isolates, strain BGT49 encodes an additional locus, which we named auxiliary cluster 4  
38 (Aux 4). The Aux 4 cluster is located on a mobile genetic element and can be used by killer cells  
39 to eliminate both *V. cholerae* and *Escherichia coli* cells in a T6SS-dependent manner. A putative  
40 toxin encoded in the cluster, which we name TpeV (*Type VI Permeabilizing Effector Vibrio*),  
41 shares no homology to known proteins and does not contain motifs or domains indicative of  
42 function. Ectopic expression of TpeV in the periplasm of *E. coli* permeabilizes cells and disrupts  
43 the membrane potential. Using confocal microscopy, we confirm that susceptible target cells  
44 become permeabilized when competed with killer cells harboring the Aux 4 cluster. We also  
45 determine that *tpeV*, the gene located immediately downstream of *tpeV*, encodes an immunity  
46 protein that neutralizes the toxicity of TpeV. Finally, we show that TpeV homologs are broadly  
47 distributed across important animal and plant pathogens and are localized in proximity to other  
48 T6SS genes. Our results suggest that TpeV is a toxin that belongs to a large family of T6SS  
49 proteins.

## 50 IMPORTANCE

51 Bacteria live in polymicrobial communities where competition for resources and space is essential  
52 for survival. Proteobacteria use the T6SS to eliminate neighboring cells and cause disease.  
53 However, the mechanisms by which many T6SS toxins kill or inhibit susceptible target cells are

54 poorly understood. The sequence of the TpeV toxin we describe here is unlike any previously  
55 described protein. We demonstrate that it has antimicrobial activity by permeabilizing cells,  
56 eliminating membrane potentials and causing severe cytotoxicity. TpeV homologs are found near  
57 known T6SS genes in human, animal and plant bacterial pathogens, indicating that the toxin is a  
58 representative member of a broadly distributed protein family. We propose that TpeV-like toxins  
59 contribute to the fitness and pathogenicity of many bacteria. Finally, since antibiotic resistance is  
60 a critical global health threat, the discovery of new antimicrobial mechanisms could lead to the  
61 development of new treatments against resistant strains.

## 62 INTRODUCTION

63 The Type VI Secretion System (T6SS) is a common bacterial weapon employed by many killer  
64 Gram-negative bacteria to translocate toxic protein effectors into adjacent target cells (1, 2). The  
65 harpoon-like proteinaceous apparatus is anchored to the membrane of killer cells by the membrane  
66 complex, which spans the inner membrane and periplasm (3–5). Hcp (hemolysin-coregulated  
67 protein) hexamers stack to form an inner tube that is capped at the distal end by a trimer of VgrG  
68 (valine-glycine repeat protein G) tip-forming proteins (2, 6, 7). PAAR (proline-alanine-alanine-  
69 arginine) proteins also interact with VgrGs and expand the toxin repertoire (8, 9). The T6SS uses  
70 a contraction mechanism that propels the inner tube and delivers the toxic payload (10–12).

71 *Vibrio cholerae* is a wide-spread gastrointestinal pathogen that has caused seven cholera  
72 pandemics (13). The bacterium is found in polymicrobial marine ecosystems in association with  
73 copepods, fish and insects (14–16). To colonize hosts and survive in environmental settings, *V.*  
74 *cholerae* employs T6SS effectors that disrupt the cell envelope of competitor cells (17–24). T6SS  
75 genes are distributed across a large cluster and two auxiliary clusters in all sequenced *V. cholerae*  
76 isolates (25, 26). In clinical strains like V52 and C6706, the large gene cluster encodes a VgrG tip-

77 forming protein with a C-terminal peptidoglycan-degrading domain (23). Auxiliary clusters 1 and  
78 2 encode the TseL lipase and VasX colicin-like effectors, respectively (19–22). An auxiliary  
79 cluster 3 is found in a subset of *V. cholerae* isolates and contains a peptidoglycan-degrading toxin  
80 (27–29).

81 Although most clinical *V. cholerae* strains encode T6SS effectors with conserved activities, *V.*  
82 *cholerae* strains obtained from sources other than patients harbor a more diverse repertoire of T6SS  
83 toxins (25, 26, 30, 31). We previously identified auxiliary 5 (Aux 5) T6SS clusters in several *V.*  
84 *cholerae* strains, which encode predicted phospholipase effectors (25). Recently, several *V.*  
85 *cholerae* strains have been shown to possess an Aux 6 T6SS cluster with antibacterial activity (31).  
86 We and others have also reported that many *V. cholerae* strains (but not C6706) contain an  
87 additional gene cluster with putative T6SS components, which we named Aux 4 (25, 32).  
88 However, the activity of the cluster, the roles played by the encoded genes in microbial competition  
89 and the toxicity of the putative effector have not been validated.

90 Here we demonstrate that the Aux 4 cluster can be used by *V. cholerae* to kill bacterial cells in a  
91 T6SS-dependent manner. We report that the toxin found within the cluster permeabilizes cells and  
92 disrupts the membrane potentials when expressed in the periplasm of *Escherichia coli* cells. A  
93 protein encoded by a gene found immediately downstream of the effector neutralizes its toxicity  
94 and acts as a protective immunity factor. Finally, we show that homologs of the Aux 4 effector are  
95 found in diverse bacterial species, including human, animal and plant pathogens. The potent  
96 antimicrobial activity of TpeV and broad distribution of identified homologs suggest the toxins  
97 confer significant competition advantages to bacteria that harbor them.

98

## 99 RESULTS

100 *The Aux 4 tpeV-tpiV are an active effector-immunity pair in strain BGT49*

101 *V. cholerae* strain BGT49 encodes the Aux 4 cluster, in addition to the canonical T6SS large  
102 operon and auxiliary clusters 1 and 2 (Fig. 1A). The Aux 4 cluster contains predicted T6SS genes:  
103 an *hcp*, a *vgrG*, a DUF4123 chaperone, and a *paar* (33) (Fig. 1A). Genes coding for a putative  
104 effector toxin (which we name *tpeV*, *Type VI Permeabilizing Effector Vibrio*, see below) and a  
105 putative immunity protein (which we name *tpiV*, *Type VI Permeabilizing Immunity Vibrio*, see  
106 below) are also found within the cluster (Fig. 1A) (32, 34, 35). The *vgrG* gene does not contain a  
107 toxic C-terminal domain, as described for the *V. cholerae* VgrG-1 or VgrG-3 (23, 36, 37).

108 Genes for a restriction modification system are found upstream of the Aux 4 cluster (Fig. 1A).  
109 Both the Aux 4 T6SS cluster and restriction modification system genes are flanked upstream by a  
110 predicted integrase and downstream by a predicted transposase (Fig. 1A). Attachment (*att*) sites  
111 similar to those found in the *Vibrio* pathogenicity island 1 (VPI-1) also flank the region (32, 38).

112 To experimentally determine that the *tpeV* gene encodes a T6SS toxin, we engineered a  
113  $\Delta tpeV \Delta tpiV$  target BGT49 strain. The  $\Delta tpeV \Delta tpiV$  target strain was then co-cultured with either  
114 wild type BGT49,  $\Delta tpeV$  (BGT49 lacking the TpeV effector) or BGT49 T6SS- killers. The  
115 recovery of the  $\Delta tpeV \Delta tpiV$  target strain was significantly reduced (by approximately 5 orders of  
116 magnitude) when co-cultured with wild type BGT49 killer cells compared to the  $\Delta tpeV$  or T6SS-  
117 killer strains (Fig. 1B). This result indicates that TpeV is a T6SS effector that is actively used by  
118 *V. cholerae* strain BGT49 to eliminate susceptible cells that lack the TpiV immunity protein.

119

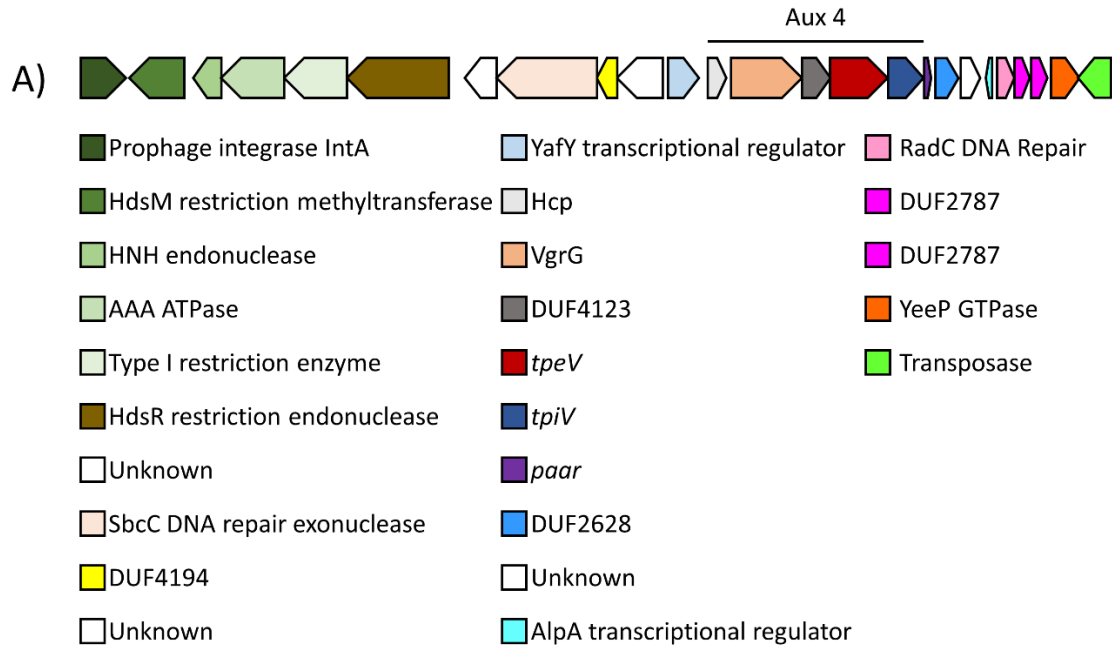

B) Target: *V. cholerae* BGT49  $\Delta tpeV\Delta tpiV$

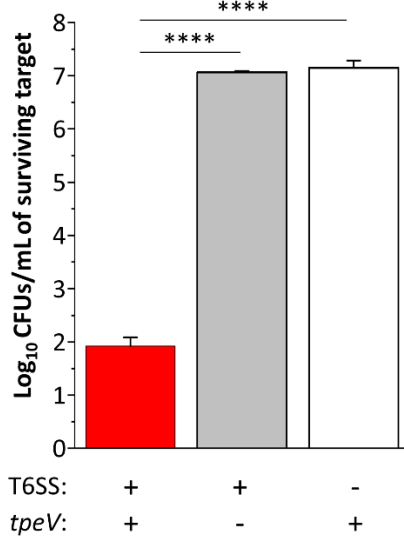

Killer *V. cholerae* BGT49 genotypes

120

121 **Figure 1. *Vibrio cholerae* strain BGT49 encodes the Aux 4 T6SS cluster and efficiently**  
 122 **eliminates target bacteria in a TpeV and T6SS-dependent manner.** A) The Aux 4 cluster  
 123 encodes predicted *hcp*, *vgrG*, DUF4123-containing chaperone, effector, immunity and *paar* genes.  
 124 The cluster is found on a predicted mobile genetic element, being flanked by integrase and  
 125 transposase genes. B) Target *V. cholerae* BGT49  $\Delta tpeV\Delta tpiV$  was co-cultured with either WT,  
 126  $\Delta tpeV$  or T6SS- killer BGT49. A one-way ANOVA with a post hoc Tukey HSD test was used to  
 127 determine significance. \*\*\*\*p < 0.0001

128 *The Aux 4 cluster can be transferred to another V. cholerae strain where it confers competitive*  
129 *advantages*

130 Since we observed that the Aux 4 cluster is located on a predicted mobile genetic element, we  
131 hypothesized that it can be used by other *V. cholerae* strains to eliminate competitor cells in a  
132 T6SS-dependent manner. In *V. cholerae* C6706, the QstR protein is a gene regulator that is  
133 required and sufficient to induce expression of T6SS genes (39, 41). We cloned the Aux4 *vgrG*,  
134 *tap*, *tpeV*, *tpiV* and *paar* genes on a plasmid (pAux4) under control of the Ptac promoter. We then  
135 introduced the pAux4 plasmid in *V. cholerae* strain C6706\*, which constitutively expresses the  
136 QstR protein but does not possess Aux 4 cluster genes on its chromosomes (24, 39–41). The *V.*  
137 *cholerae* C6706\* killer with the Aux 4 cluster on a plasmid (C6706\*/pAux4) efficiently eliminates  
138 the parental target strain, unlike a killer C6706\* strain carrying a plasmid control (Fig. 2A). By  
139 contrast, a C6706\*/pAux4 T6SS- strain cannot eliminate the parental target strain (Fig. 2A). To  
140 provide further evidence that TpiV can confer immunity, we introduced the *tpiV* gene into target  
141 *V. cholerae* C6706 and co-cultured the strain with killer C6706\*/pAux4 cells. *V. cholerae*  
142 C6706\*/pAux4 kills *V. cholerae* target cells with a plasmid control, but not when they encode the  
143 *tpiV* gene (Fig. 2B).

144 We next inquired if the Aux 4 cluster can be used by *V. cholerae* to kill other target bacterial  
145 species. A C6706\* strain with a functional T6SS that lacks both native TseL and VasX effectors  
146 poorly eliminates *E. coli* cells compared to a C6706\* strain that harbors both toxins (Fig. 2C) (42,  
147 43). However, the introduction of the Aux 4 cluster into the C6706\* strain lacking TseL and VasX  
148 effectors restores its ability to efficiently eliminate *E. coli* cells (Fig. 2C). We recently reported  
149 that target *E. coli* cells are protected against T6SS attacks from strain C6706\* when co-cultured  
150 on LB medium supplemented with 0.4% glucose (44). By contrast, we observe that killer

151 C6706\*/pAux4 can bypass the glucose-mediated resistance to efficiently eliminate *E. coli* cells  
 152 even when the co-culture is performed on LB medium with glucose (Fig. 2D). These results  
 153 confirm that the Aux 4 intoxicates competitor bacterial cells.

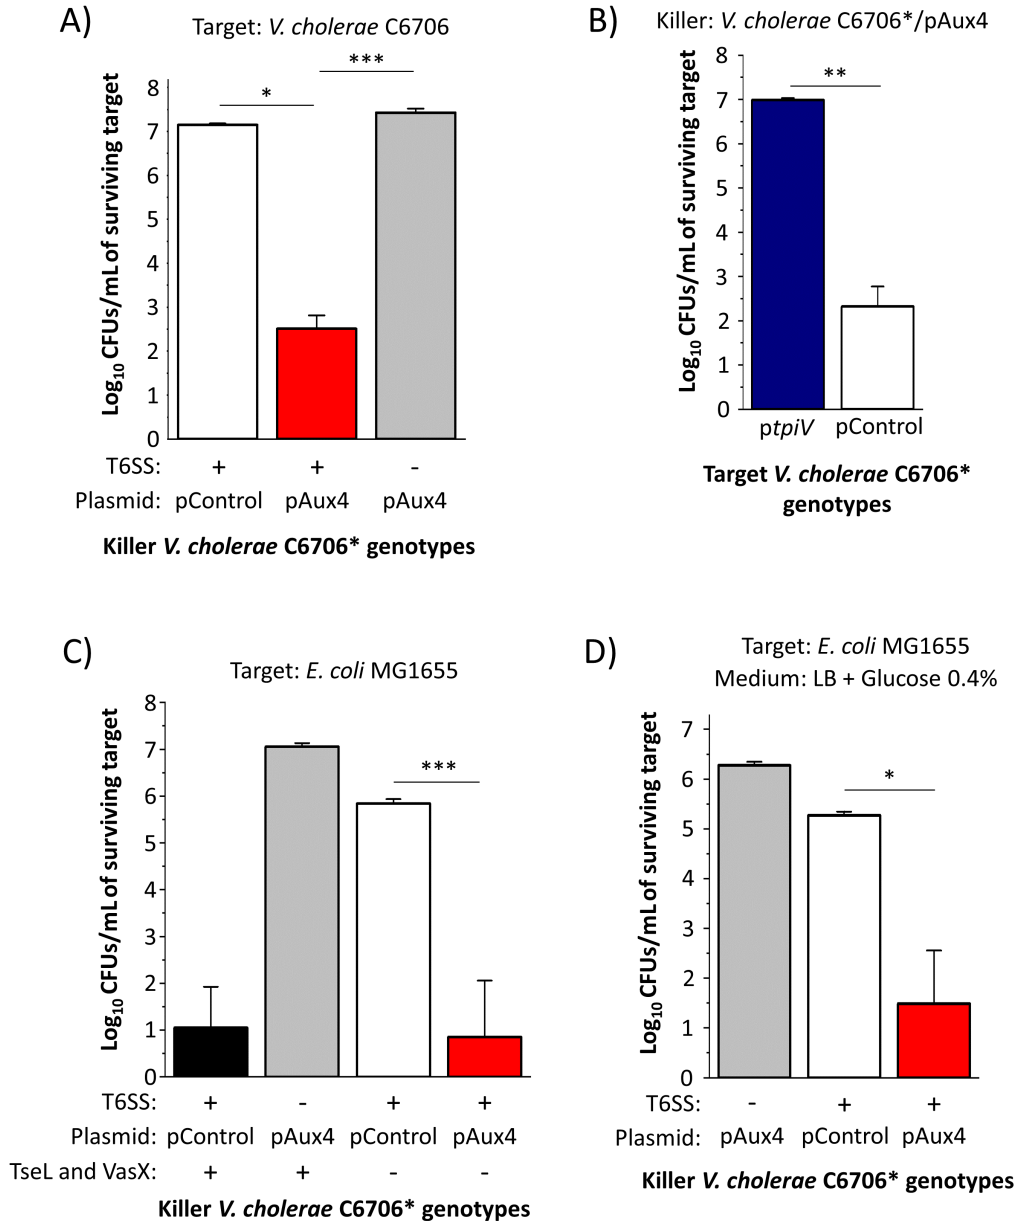

168 **Figure 2. *V. cholerae* C6706\* can use the Aux 4 cluster to eliminate target cells in a T6SS-**  
 169 **dependent manner.** A) *V. cholerae* C6706\* (T6SS+ or T6SS-) with a plasmid control or a plasmid  
 170 encoding the Aux 4 cluster were co-cultured with target parental *V. cholerae* C6706. A one-way  
 171 ANOVA with a post hoc Tukey HSD test was used to determine significance. B) Killer *V. cholerae*  
 172 C6706\* with the Aux 4 cluster were co-cultured with target C6706 cells with a plasmid control or



173 a plasmid encoding *tpeV*. Welch's t-test was used to determine significance. C) *V. cholerae* C6706\*  
174 with deletions in the known *tseL* and *vasX* T6SS effectors containing either a plasmid control or a  
175 plasmid with Aux 4 was co-cultured with *E. coli* MG1655 cells. A one-way ANOVA with a post  
176 hoc Tukey HSD test was used to determine significance. D) *V. cholerae* C6706\* with a plasmid  
177 control or a plasmid encoding the Aux 4 cluster were co-cultured with *E. coli* MG1655 on LB  
178 medium with 0.4% glucose. A one-way ANOVA with a post hoc Tukey HSD test was used to  
179 determine significance. \*\*\*  $p < 0.001$ , \*\*  $p < 0.01$  \*  $p < 0.05$

180

### 181 *TpeV* permeabilizes cells and disrupts the membrane potential

182 We next used confocal microscopy to examine co-cultures between fluorescently labelled target  
183 *V. cholerae* C6706 cells (shown as cyan) and unlabeled killer C6706\*/pAux4 cells (Fig. 3A). To  
184 each co-culture we added propidium iodine (PI), a molecule that cannot penetrate cells with intact  
185 membranes but exhibits high fluorescence when bound to the DNA of cells with compromised  
186 membranes. Fluorescently labelled *V. cholerae* target cells are successfully eliminated when co-  
187 cultured with killer C6706\*/pAux4 cells but remain viable when killer cells cannot assemble the  
188 T6SS apparatus (T6SS-) (Fig. 3A). Furthermore, a robust PI signal (depicted with red) is detectable  
189 when target cells are co-cultured with C6706\*/pAux4 cells (Fig. 3A).

190 Since we observed that *V. cholerae* cells harboring the Aux 4 cluster can kill and permeabilize  
191 target cells in a T6SS-dependent manner, we sought to further characterize the activity of the TpeV  
192 effector. The protein does not share primary sequence homology to known toxins and does not  
193 contain motifs or domains indicative of function. Tertiary structural prediction algorithms also fail  
194 to detect significant homologs with known functions. TpeV has 11 cysteine residues, suggesting  
195 that multiple disulfide bonds could play roles in stabilizing the protein. Transmembrane prediction  
196 algorithms TMHMM and Phobius do not detect extensive transmembrane regions and SignalP 5.0  
197 does not predict a signal sequence (Supplementary Fig. 1 and 2) (45–47). We also attempted to  
198 identify TpeV homologs using the secondary structure predictor Jpred (48). While most homologs

199 are hypothetical proteins with unknown functions, some contain domains similar to the  
200 peptidoglycan-binding C-terminal regions of the OmpA protein (49, 50). OmpA proteins are  
201 involved in pathogenesis and have diverse functions that include formation of porins and channels  
202 (51, 52). Because target *V. cholerae* cells have a substantial PI signal when co-cultured with killer  
203 cells harboring the Aux 4 cluster, we hypothesized that TpeV might permeabilize target cells when  
204 delivered to the periplasm.

205 To test this prediction, we introduced plasmid-borne *tpeV* with a periplasmically-directing *pelB*  
206 sequence under the control of an inducible promoter into *E. coli* cells. A significantly higher PI  
207 signal is detected when *E. coli* cells are induced to express periplasmic TpeV compared to cells  
208 that harbor a plasmid control (Fig. 3B). We also hypothesized that TpeV disrupts the bacterial cell  
209 membrane potential (19, 53, 54). To test this hypothesis, we used the Bis-(1,3-Dibutylbarbituric  
210 acid) Trimethine Oxonol ((DiBAC<sub>4</sub>(3)) potential-sensitive dye, which is excluded from cells with  
211 a normal membrane potential but exhibits fluorescence in depolarized cells (54–56). *E. coli* cells  
212 that express periplasmically-delivered TpeV have significantly higher DiBAC<sub>4</sub>(3) uptake  
213 compared to *E. coli* that express a plasmid control (Fig. 3C). To probe if TpeV can disrupt the  
214 membrane potential in a T6SS-dependent manner, we co-cultured *V. cholerae* BGT49  $\Delta tpeV \Delta tpiV$   
215 target cells with either BGT49 wild type or BGT49  $\Delta tpeV$  killers. Following co-cultures with wild  
216 type but not BGT49  $\Delta tpeV$  killers, bacterial membrane potentials are disrupted as cells display an  
217 elevated DiBAC<sub>4</sub>(3) signal (Fig. 3C). Taken together, these findings demonstrate that TpeV  
218 permeabilizes cells and disrupts the membrane potential of target bacteria.

219

220

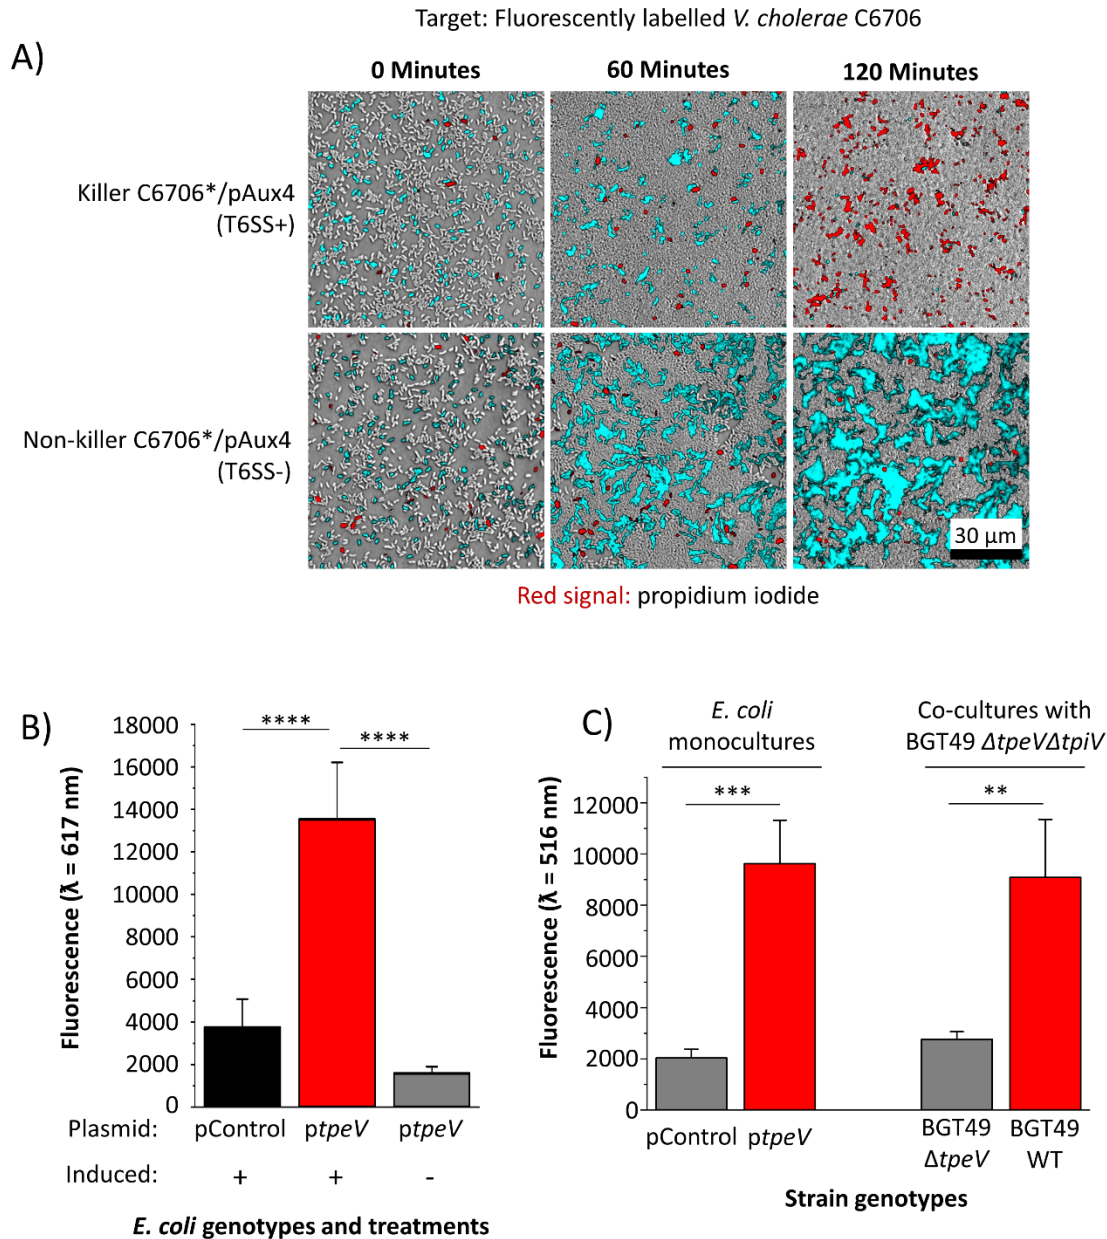

221  
222

223 **Figure 3. TpeV permeabilizes target cells and disrupts the membrane potential, leading to**  
 224 **cytotoxicity.** A) Confocal microscopy was used to visualize a co-culture between C6706\* cells  
 225 with Aux 4 (T6SS- or T6SS+) and fluorescently labelled target C6706 cells in the presence of  
 226 propidium iodide. Scale bar = 30 μm. B) *E. coli* cells carrying a periplasmic *tpeV* construct or  
 227 plasmid control were incubated with propidium iodide. Fluorescence readings were taken at an  
 228 excitation  $\lambda = 535$  nm and emission  $\lambda = 617$  nm. A one-way ANOVA with a post hoc Tukey HSD  
 229 test was used to determine significance. C) *E. coli* cells carrying a periplasmic *tpeV* construct or  
 230 plasmid control, or *V. cholerae* BGT49 co-cultures between target  $\Delta tpeV \Delta tpiV$  and wild type or  
 231  $\Delta tpeV$  killer cells were incubated with the membrane potential-sensitive DiBAC<sub>4</sub>(3) dye.  
 232 Fluorescence readings were taken at an excitation  $\lambda = 490$  nm and emission  $\lambda = 516$  nm. Welch's  
 233 t-tests were used to determine significance. \*\*\*\* p < 0.0001, \*\*\* p < 0.001, \*\* p < 0.01

234 *TpeV* belongs to a large family of T6SS proteins

235 Since the sequence or predicted structure of TpeV shares no homology to known toxins (including  
236 known permeabilizing toxins), we used PHMMER to search if homologs are present in other  
237 bacterial species (57). We identified *tpeV*-like genes across diverse Gammaproteobacteria species  
238 (Fig. 4, Supplementary Table 1). In all selected bacterial species, genes coding for TpeV homologs  
239 are found near known T6SS genes like *hcp*, *vgrG*, DUF4123-containing chaperones or other  
240 structural components (Fig. 4). Our results indicate that TpeV is a representative member of a  
241 widely spread family of T6SS toxins with antimicrobial activity that allow cells to eliminate  
242 competitor bacteria.

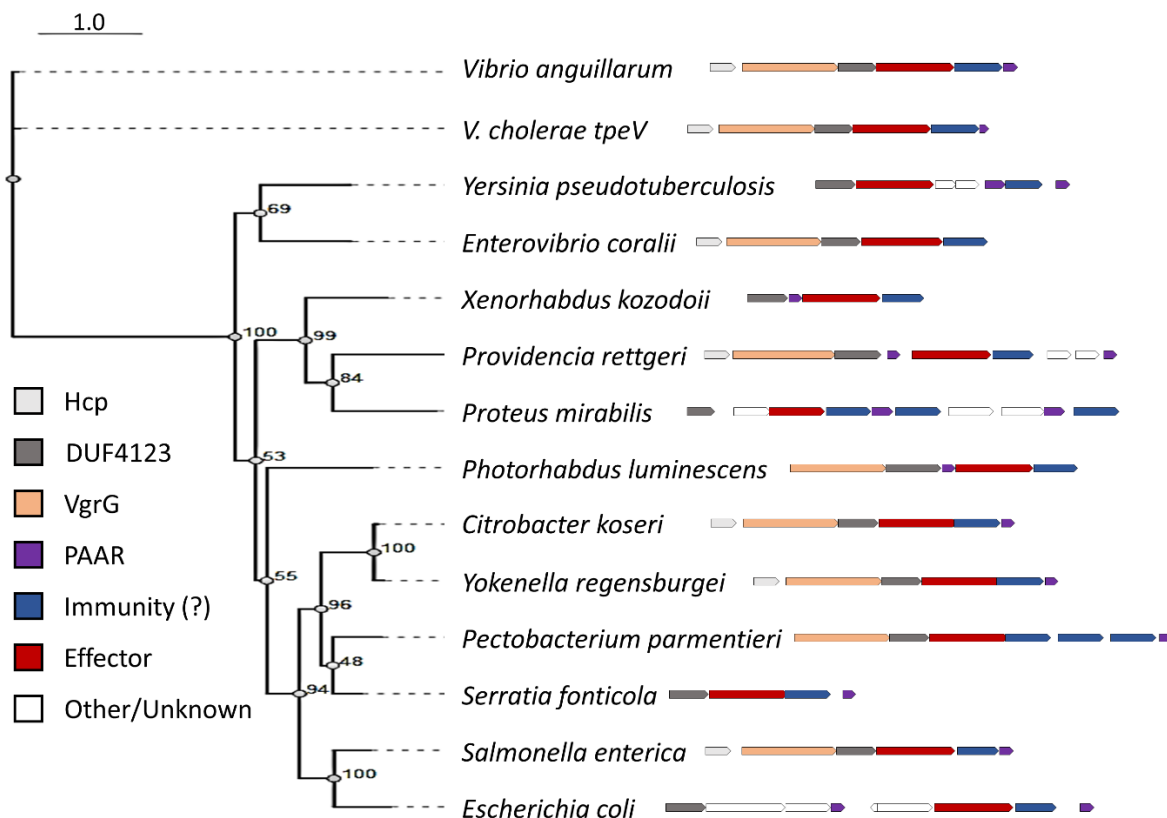

243

244 **Figure 4. *TpeV* homologs are found in many bacterial species near other T6SS genes.** TpeV  
245 homologs were identified using PHMMER and selected sequences were aligned using MUSCLE.  
246 A phylogenetic tree was constructed with 100 bootstraps.

## 247 DISCUSSION

248 Here we show that many bacterial species encode homologs of a previously undescribed T6SS  
249 protein that intoxicates, permeabilizes and disrupts the membrane potential of target cells. While  
250 studies have examined antibacterial effectors from clinical *V. cholerae* isolates such as C6706 and  
251 V52, we and others found that strains isolated from sources other than patients encode a more  
252 diverse set of putative T6SS toxins (3, 19, 22, 25, 26, 32). The VasX *V. cholerae* effector encoded  
253 in the Aux 2 cluster is a large protein that contains a C-terminal colicin domain effective at  
254 eliminating both bacterial and eukaryotic cells (19, 20). Since it is predicted to form large pores,  
255 VasX permeabilizes cells and allows passage of molecules like PI into the cell (19). The  
256 *Pseudomonas aeruginosa* Tse4 and the *Serratia marcescens* Ssp6 effectors are both relatively small  
257 proteins that form ion-selective pores but do not allow larger molecules like PI to enter cells (53,  
258 54). Recently, *Vibrio parahaemolyticus* has also been shown to harbor T6SS effectors that disrupt  
259 cellular membranes (58).

260 Importantly, the *V. cholerae* TpeV T6SS effector we describe in this study does not contain  
261 predicted domains or motifs with known functions and its sequence does not share homology to  
262 any previously described T6SS effectors. We provide evidence that TpeV is a T6SS toxin that can  
263 be used by *V. cholerae* cells to permeabilize target cells and disrupt the cell membrane potential  
264 (Fig. 2, Fig. 3). The cell membrane potential is essential for ATP synthesis, cell division and  
265 membrane transport (59–61). Therefore, TpeV-mediated toxicity is likely to inflict substantial  
266 damage to target cells by perturbing multiple essential processes.

267 We hypothesize that TpeV could permeabilize cells by forming pores. Pore-forming toxins (PFTs)  
268 are widespread among all kingdoms of life (62–66). Based on the secondary structure of the  
269 membrane spanning domain, two major classes of pore-forming toxins (PFTs) have been

270 described:  $\alpha$ -PFTs and  $\beta$ -PFTs (62, 64, 67).  $\alpha$ -PTFs include the *E. coli* colicin and cytolysin A  
271 families, while  $\beta$ -PFTs are found in many Gram-positive bacterial species and contribute to the  
272 virulence of pathogens like *Staphylococcus aureus* and *Clostridium perfringens* (64, 66–68). Our  
273 homology predictions suggest that TpeV might harbor a peptidoglycan-binding OmpA-like  
274 domain (49). RmpM is a *Neisseria meningitidis* periplasmic protein that also possesses an OmpA-  
275 like domain (50). Experimental evidence indicates that RmpM stabilizes oligomeric porins in the  
276 outer membrane (50, 69). Rather than form new pores, it is also possible that TpeV might interact  
277 with and disrupt the normal functions of existing porins or channels in the membranes of target  
278 bacteria. Future experiments will determine if TpeV forms pores or employs other mechanisms  
279 that damage membranes and permeabilize cells.

280 In strain BGT49, the Aux 4 cluster and a restriction modification system are found near a prophage  
281 integrase and a transposase (Fig. 1A). This suggests that the genes are located on a mobile genetic  
282 element that can be transferred between bacterial cells to confer competitive advantages against  
283 phages and other bacterial cells (32). The *Vibrio cholerae* T6SS Aux 3 cluster was also recently  
284 shown to be located on a mobile genetic element (29). Our results showing that *V. cholerae* strain  
285 C6706\* can use the Aux 4 cluster to kill parental cells supports the hypothesis that the Aux 4  
286 cluster can be transferred to confer competitive advantages. This hypothesis is further supported  
287 by our observation that TpeV homologs are found close to other T6SS genes in many bacterial  
288 species, including human pathogens (*Providencia rettgeri*, *Proteus mirabilis*, *Citrobacter koseri*,  
289 *Yokenella regensburgei*, *Serratia fonticola*, *Salmonella enterica*, and *E. coli*), animal pathogens  
290 (*Vibrio anguillarum* and *Photobacterium luminescens*) and plant pathogens (*Pectobacterium*  
291 *parmentieri*) (70–77) (Fig. 4). TpeV homologs found in other bacterial species are also located  
292 near transposase-like genes (data not shown).



293 All known T6SS toxic effectors are neutralized by cognate immunity proteins, which are generally  
294 encoded by genes adjacent to effectors (19, 78). We found that *tpiV*, the gene found immediately  
295 downstream of *tpeV*, confers immunity to target cells against *tpeV*-mediated toxicity (Fig. 1B and  
296 2B). SignalP predicts that TpiV encodes a periplasmic Sec-tag, which is expected since TpeV  
297 exhibits its toxicity when delivered to the periplasm of target cells (Supp. Fig. 2, Fig. 3A). In other  
298 species, we observed that multiple putative immunity proteins can be found near TpeV homologs  
299 (Fig. 4). Additional studies are required to confirm which predicted TpiV-like proteins are the  
300 cognate immunity factors for the TpeV homologs.

301 In conclusion, we demonstrate that the T6SS Aux 4 cluster found in many *V. cholerae* isolates  
302 encodes a toxin that can be used to eliminate competitor bacteria. TpeV is a T6SS effector that  
303 permeabilizes target bacteria and disrupts the membrane potential, leading to severe cellular  
304 intoxication. However, target cells expressing TpiV are protected and resist TpeV-mediated  
305 toxicity. Finally, we find that TpeV homologs are widespread among Gram-negative bacteria,  
306 suggesting the protein represents a novel and potent antimicrobial agent of interest for further  
307 studies. Understanding the molecular mechanisms of antimicrobial toxins that drive competition  
308 and antagonism could lead to the development of novel biotechnology and medical applications.

309

310

311

312

313

## 314 **METHODS**

### 315 *Bacterial strains and plasmids*

316 Plasmids were constructed using standard molecular biology techniques. Gibson mix reagents,  
317 restriction enzymes and polymerase were used as recommended by manufacturers (Promega and  
318 New England Biolabs). Plasmids were verified by PCR and Sanger sequencing (Eurofins). *V.*  
319 *cholerae* C6706 mutant strains were made using pKAS allelic exchange methods, as described  
320 previously (79). *V. cholerae* strain BGT49 mutant strains were made using natural transformation,  
321 as described previously with modifications (80, 81). Briefly, overnight cultures were back-diluted  
322 in fresh LB medium for approximately 1 hour and then statically incubated overnight at 30°C in  
323 liquid LB medium with a sterile crab shell fragment. Crab shells were transferred and incubated  
324 in fresh LB medium containing 30-50 µg of a plasmid engineered to encode ~1000bp flanking  
325 regions to replace the desired genes with an antibiotic cassette. Cells were incubated statically  
326 overnight at 30°C liquid LB medium and then spread on antibiotic plates to select for  
327 transformants. BGT49 mutants were confirmed by PCR and antibiotic resistance. Bacterial strains  
328 and plasmids used are listed in Supplementary Table 2.

### 329 *Bacterial Competition Assays*

330 Bacterial cultures were grown overnight in liquid LB medium at 37°C with shaking. Overnight  
331 cultures were back-diluted and incubated in liquid LB medium at 37°C with shaking for 3 hours.  
332 Bacterial cultures were then normalized to an OD<sub>600</sub> absorbance of 1. If strains harbored plasmids,  
333 cultures were grown overnight with antibiotics to maintain plasmids and 100 µM IPTG if plasmids  
334 contained an inducible promoter. If strains were grown in media containing antibiotics, liquid  
335 cultures were then washed three times with fresh LB medium before they were co-cultured. A 50



336  $\mu\text{L}$  mixture aliquot of ratio of 10:1 killer:target cells was spotted on a 0.22  $\mu\text{m}$  pore size filter  
337 paper, which was placed on LB agar media and incubated at 37°C. After 3 hours, filters were  
338 vortexed in sterile LB media for 30 seconds. 100 $\mu\text{L}$  of serial dilutions were then spread on plates  
339 containing the required antibiotic to select for target cells. Data from three co-cultures were used  
340 to determine significance. Results are representative of at least two independent experiments.

#### 341 *Confocal microscopy*

342 Overnight cultures were back-diluted 1:100 for 3 hours in liquid LB medium. Samples were then  
343 normalized to an OD<sub>600</sub> of 10. 1  $\mu\text{L}$  aliquot of 10:1 killer:target cell mixture was spotted on top of  
344 a dry 8- $\mu\text{L}$  aliquot of propidium iodide (100  $\mu\text{g}/\text{mL}$ ) on an LB agar pad. Nikon A1R confocal  
345 microscope using a Perfect Focus System with a 40x objective (Plan Fluor ELWD 40x DIC M N1)  
346 was used to stabilize the focus in the plane of the colony growth. Cells were imaged at 96-100%  
347 humidity and 37°C. Images were processed using ImageJ. Results are representative of at least  
348 three independent experiments.

#### 349 *Membrane permeabilization assays*

350 Bacterial cultures of *E. coli* Shuffle T7 Express (New England Biolabs) cells carrying either a  
351 control plasmid or a periplasmic *tpcV* construct were grown overnight in liquid LB medium  
352 supplemented with 0.2% glucose and ampicillin at 37°C with shaking. Cells were washed three  
353 times with LB and 100x back-dilutions were made in fresh liquid LB medium with 500  $\mu\text{M}$  IPTG  
354 and ampicillin. Strains were incubated at 37°C for 2 hours, washed three times with PBS and  
355 normalized to an OD<sub>600</sub> of 1. 100 $\mu\text{L}$  of each culture was incubated with 1  $\mu\text{L}$  propidium iodide  
356 (100  $\mu\text{g}/\text{mL}$ ) for 15-30 minutes. Fluorescence values were taken on a Synergy BioTek plate reader  
357 using an excitation  $\lambda = 535$  nm and emission  $\lambda = 617$  nm and normalized by subtracting the average

358 values from samples with propidium iodide but no cells. Data represents the averages obtained  
359 from seven biological replicates from two independent experiments.

### 360 *Membrane potential assays*

361 Bacterial cultures of *E. coli* Shuffle T7 Express (New England Biolabs) cells carrying either a  
362 control plasmid or a periplasmic *tpeV* construct were grown overnight with shaking at 37°C in  
363 liquid LB medium supplemented with 0.2% glucose and ampicillin. Cells were washed three times  
364 with LB and 100x back-dilutions were incubated at 37°C for 2 hours in fresh liquid LB medium  
365 with 500 µM IPTG and ampicillin. Cells were again washed three times with PBS and normalized  
366 to an OD<sub>600</sub> of 1 in PBS. Cells were incubated for 30 minutes in the dark with DiBAC4(3) at a final  
367 concentration of 10 µM and washed with three times with PBS. Fluorescence values were taken  
368 on a Synergy BioTek plate reader using an excitation  $\lambda = 490$  nm and emission  $\lambda = 516$  nm. Data  
369 represents the averages obtained from six biological replicates from two independent experiments.

370 For co-culture measurements of membrane potentials, overnight cultures of the indicated *V.*  
371 *cholerae* BGT49 strains were back-diluted and incubated in liquid LB medium at 37°C with  
372 shaking for 3 hours. Bacterial cultures were then normalized to an OD<sub>600</sub> absorbance of 1. A 50  
373 µL mixture aliquot of ratio of 1:1 killer:target cells was spotted on a 0.22 µm pore size filter paper,  
374 which was placed on LB agar media and incubated at 37°C. After 3 hours, filters were vortexed in  
375 sterile LB media for 30 seconds. Cells were washed three times with PBS, normalized to an OD<sub>600</sub>  
376 of 1, incubated for 30 minutes in the dark with DiBAC4(3) at a final concentration of 10 µM and  
377 washed with three times with PBS. Fluorescence values were taken on a Synergy BioTek plate  
378 reader using an excitation  $\lambda = 490$  nm and emission  $\lambda = 516$  nm. Data represents the averages  
379 obtained from six biological replicates from two independent experiments.

380 *Bioinformatic analyses*

381 The HHMER server was used to search for homologs of TpeV in the UniProtKB database (82).  
382 Selected homologs were aligned using MUSCLE (83). A phylogenetic tree was constructed using  
383 PhyML with 100 bootstrap values and visualized using PRESTO (84–86). Putative immunity  
384 proteins were predicted based on homology to TpiV and genomic location. Truncated VgrG-like  
385 genes with stop codons were observed in some species but were excluded from Fig. 4.

386 **REFERENCES**

- 387 1. Pukatzki S, Ma AT, Sturtevant D, Krastins B, Sarracino D, Nelson WC, Heidelberg JF,  
388 Mekalanos JJ. 2006. Identification of a conserved bacterial protein secretion system in  
389 *Vibrio cholerae* using the *Dictyostelium* host model system. *Proc Natl Acad Sci*  
390 103:1528–1533.
- 391 2. Mougous JD, Cuff ME, Raunser S, Shen A, Zhou M, Gifford CA, Goodman AL,  
392 Joachimiak G, Ordoñez CL, Lory S, Walz T, Joachimiak A, Mekalanos JJ. 2006. A  
393 Virulence Locus of *Pseudomonas aeruginosa* Encodes a Protein Secretion Apparatus.  
394 *Science* 312:1526–1530.
- 395 3. Zheng J, Ho B, Mekalanos JJ. 2011. Genetic Analysis of Anti-Amoebae and Anti-  
396 Bacterial Activities of the Type VI Secretion System in *Vibrio cholerae*. *PLoS One*  
397 6:e23876.
- 398 4. Aschtgen MS, Thomas MS, Cascales E. 2010. Anchoring the type VI secretion system to  
399 the peptidoglycan: TssL, TagL, TagP... what else? *Virulence* 1:535–540.
- 400 5. Rapisarda C, Cherrak Y, Kooger R, Schmidt V, Pellarin R, Logger L, Cascales E, Pilhofer  
401 M, Durand E, Fronzes R. 2019. In situ and high-resolution cryo- EM structure of a  
402 bacterial type VI secretion system membrane complex . *EMBO J* 38:1–18.
- 403 6. Ballister ER, Lai AH, Zuckermann RN, Cheng Y, Mougous JD. 2008. In vitro self-  
404 assembly of tailorable nanotubes from a simple protein building block. *Proc Natl Acad Sci*  
405 105:3733–3738.
- 406 7. Silverman JM, Agnello DM, Zheng H, Andrews BT, Li M, Catalano CE, Gonen T,  
407 Mougous JD. 2013. Haemolysin Coregulated Protein Is an Exported Receptor and  
408 Chaperone of Type VI Secretion Substrates. *Mol Cell* 51:584–593.
- 409 8. Cianfanelli FR, Alcoforado Diniz J, Guo M, De Cesare V, Trost M, Coulthurst SJ. 2016.  
410 VgrG and PAAR Proteins Define Distinct Versions of a Functional Type VI Secretion  
411 System. *PLoS Pathog* 12:e1005735.
- 412 9. Wood TE, Howard SA, Wettstadt S, Filloux A. 2019. PAAR proteins act as the ‘sorting

- 413 hat' of the type VI secretion system. *Microbiology* 165:1203–1218.
- 414 10. Bröms JE, Ishikawa T, Wai SN, Sjöstedt A. 2013. A functional VipA-VipB interaction is  
415 required for the type VI secretion system activity of *Vibrio cholerae* O1 strain A1552.  
416 *BMC Microbiol* 13:96.
- 417 11. Bönemann G, Pietrosiuk A, Diemand A, Zentgraf H, Mogk A. 2009. Remodelling of  
418 VipA/VipB tubules by ClpV-mediated threading is crucial for type VI protein secretion.  
419 *EMBO J* 28:315–325.
- 420 12. Kube S, Kapitein N, Zimniak T, Herzog F, Mogk A, Wendler P. 2014. Structure of the  
421 VipA/B Type VI Secretion Complex Suggests a Contraction-State-Specific Recycling  
422 Mechanism. *Cell Rep* 8:20–30.
- 423 13. Sack DA, Sack RB, Nair GB, Siddique A. 2004. Cholera. *Lancet* 363:223–233.
- 424 14. de Magny GC, Mozumder PK, Grim CJ, Hasan NA, Naser MN, Alam M, Sack RB, Huq  
425 A, Colwell RR. 2011. Role of zooplankton diversity in *Vibrio cholerae* population  
426 dynamics and in the incidence of cholera in the Bangladesh sundarbans. *Appl Environ*  
427 *Microbiol* 77:6125–6132.
- 428 15. Senderovich Y, Izhaki I, Halpern M. 2010. Fish as reservoirs and vectors of *Vibrio*  
429 *cholerae*. *PLoS One* 5:e8607.
- 430 16. Sela R, Hammer BK, Halpern M. 2020. Quorum-sensing signaling by chironomid egg  
431 masses' microbiota, affect Haemagglutinin/Protease (HAP) production by *Vibrio*  
432 *cholerae*. *Mol Ecol* 1–11.
- 433 17. Logan SL, Thomas J, Yan J, Baker RP, Shields DS, Xavier JB, Hammer BK,  
434 Parthasarathy R. 2018. The *Vibrio cholerae* type VI secretion system can modulate host  
435 intestinal mechanics to displace gut bacterial symbionts. *Proc Natl Acad Sci* 115:E3779–  
436 E3787.
- 437 18. Zhao W, Caro F, Robins W, Mekalanos JJ. 2018. Antagonism toward the intestinal  
438 microbiota and its effect on *Vibrio cholerae* virulence. *Science* 359:210–213.
- 439 19. Miyata ST, Unterweger D, Rudko SP, Pukatzki S. 2013. Dual Expression Profile of Type  
440 VI Secretion System Immunity Genes Protects Pandemic *Vibrio cholerae*. *PLoS Pathog*  
441 9:e1003752.
- 442 20. Miyata ST, Kitaoka M, Brooks TM, McAuley SB, Pukatzki S. 2011. *Vibrio cholerae*  
443 Requires the Type VI Secretion System Virulence Factor VasX To Kill *Dictyostelium*  
444 *discoideum*. *Infect Immun* 79:2941–2949.
- 445 21. Russell AB, LeRoux M, Hathazi K, Agnello DM, Ishikawa T, Wiggins PA, Wai SN,  
446 Mougous JD. 2013. Diverse type VI secretion phospholipases are functionally plastic  
447 antibacterial effectors. *Nature* 496:508–512.
- 448 22. Ho BT, Fu Y, Dong TG, Mekalanos JJ. 2017. *Vibrio cholerae* type 6 secretion system  
449 effector trafficking in target bacterial cells. *Proc Natl Acad Sci* 114:9427–9432.
- 450 23. Brooks TM, Unterweger D, Bachmann V, Kostiuk B, Pukatzki S. 2013. Lytic Activity of

- 451 the *Vibrio cholerae* Type VI Secretion Toxin VgrG-3 Is Inhibited by the Antitoxin TsaB. J  
452 Biol Chem 288:7618–7625.
- 453 24. Crisan C V., Hammer BK. 2020. The *Vibrio cholerae* type VI secretion system: toxins,  
454 regulators and consequences. Environ Microbiol 22:4112–4122.
- 455 25. Crisan C V., Chande AT, Williams K, Raghuram V, Rishishwar L, Steinbach G, Watve  
456 SS, Yunker P, Jordan IK, Hammer BK. 2019. Analysis of *Vibrio cholerae* genomes  
457 identifies new type VI secretion system gene clusters. Genome Biol 20:163.
- 458 26. Unterweger D, Miyata ST, Bachmann V, Brooks TM, Mullins T, Kostiuk B, Provenzano  
459 D, Pukatzki S. 2014. The *Vibrio cholerae* type VI secretion system employs diverse  
460 effector modules for intraspecific competition. Nat Commun 5:3549.
- 461 27. Altindis E, Dong T, Catalano C, Mekalanos J. 2015. Secretome Analysis of *Vibrio*  
462 *cholerae* Type VI Secretion System Reveals a New Effector-Immunity Pair. MBio  
463 6:e00075.
- 464 28. Hersch SJ, Watanabe N, Stietz MS, Manera K, Kamal F, Burkinshaw B, Lam L, Pun A, Li  
465 M, Savchenko A, Dong TG. 2020. Envelope stress responses defend against type six  
466 secretion system attacks independently of immunity proteins. Nat Microbiol 5:706–714.
- 467 29. Santoriello FJ, Michel L, Unterweger D, Pukatzki S. 2020. Pandemic *Vibrio cholerae*  
468 shuts down site-specific recombination to retain an interbacterial defence mechanism. Nat  
469 Commun 11:6246.
- 470 30. Kirchberger PC, Unterweger D, Provenzano D, Pukatzki S, Boucher Y. 2017. Sequential  
471 displacement of Type VI Secretion System effector genes leads to evolution of diverse  
472 immunity gene arrays in *Vibrio cholerae*. Sci Rep 7:45133.
- 473 31. Drebes Dörr NC, Blokesch M. 2020. Interbacterial competition and anti-predatory  
474 behaviour of environmental *Vibrio cholerae* strains. Environ Microbiol 22:4485–4504.
- 475 32. Labbate M, Orata FD, Petty NK, Jayatilleke ND, King WL, Kirchberger PC, Allen C,  
476 Mann G, Mutreja A, Thomson NR, Boucher Y, Charles IG. 2016. A genomic island in  
477 *Vibrio cholerae* with VPI-1 site-specific recombination characteristics contains CRISPR-  
478 Cas and type VI secretion modules. Sci Rep 6:36891.
- 479 33. Cascales E, Cambillau C. 2012. Structural biology of type VI secretion systems. Philos  
480 Trans R Soc Lond B Biol Sci 367:1102–1111.
- 481 34. Unterweger D, Kostiuk B, Ötjengerdes R, Wilton A, Diaz-Satizabal L, Pukatzki S. 2015.  
482 Chimeric adaptor proteins translocate diverse type VI secretion system effectors in *Vibrio*  
483 *cholerae*. EMBO J 34:2198–2210.
- 484 35. Shneider MM, Buth SA, Ho BT, Basler M, Mekalanos JJ, Leiman PG. 2013. PAAR-  
485 repeat proteins sharpen and diversify the type VI secretion system spike. Nature 500:350–  
486 353.
- 487 36. Durand E, Derrez E, Audoly G, Spinelli S, Ortiz-Lombardia M, Raoult D, Cascales E,  
488 Cambillau C. 2012. Crystal Structure of the VgrG1 Actin Cross-linking Domain of the  
489 *Vibrio cholerae* Type VI Secretion System. J Biol Chem 287:38190–38199.

- 490 37. Ma AT, Mekalanos JJ. 2010. In vivo actin cross-linking induced by *Vibrio cholerae* type  
491 VI secretion system is associated with intestinal inflammation. *Proc Natl Acad Sci*  
492 107:4365–4370.
- 493 38. Karaolis DKR, Johnson JA, Bailey CC, Boedeker EC, Kaper JB, Reeves PR. 1998. A  
494 *Vibrio cholerae* pathogenicity island associated with epidemic and pandemic strains. *Proc*  
495 *Natl Acad Sci U S A* 95:3134–3139.
- 496 39. Watve SS, Thomas J, Hammer BK. 2015. CytR Is a Global Positive Regulator of  
497 Competence, Type VI Secretion, and Chitinases in *Vibrio cholerae*. *PLoS One*  
498 10:e0138834.
- 499 40. Lo Scudato M, Blokesch M. 2013. A transcriptional regulator linking quorum sensing  
500 and chitin induction to render *Vibrio cholerae* naturally transformable. *Nucleic Acids Res*  
501 41:3644–3658.
- 502 41. Jaskolska M, Stutzmann S, Stoudmann C, Blokesch M. 2018. QstR-dependent regulation  
503 of natural competence and type VI secretion in *Vibrio cholerae*. *Nucleic Acids Res*  
504 46:10619–10634.
- 505 42. Dong TG, Ho BT, Yoder-Himes DR, Mekalanos JJ. 2013. Identification of T6SS-  
506 dependent effector and immunity proteins by Tn-seq in *Vibrio cholerae*. *Proc Natl Acad*  
507 *Sci* 110:2623–2628.
- 508 43. Liang X, Kamal F, Pei T, Xu P, Mekalanos JJ, Dong TG. 2019. An onboard checking  
509 mechanism ensures effector delivery of the type VI secretion system in *Vibrio cholerae*.  
510 *Proc Natl Acad Sci* 116:23292–23298.
- 511 44. Crisan C V, Nichols HL, Wiesenfeld S, Steinbach G, Yunker PJ, Hammer BK. 2021.  
512 Glucose confers protection to *Escherichia coli* against contact killing by *Vibrio cholerae*.  
513 *Sci Rep* 11:2935.
- 514 45. Almagro Armenteros JJ, Tsirigos KD, Sønderby CK, Petersen TN, Winther O, Brunak S,  
515 von Heijne G, Nielsen H. 2019. SignalP 5.0 improves signal peptide predictions using  
516 deep neural networks. *Nat Biotechnol* 37:420–423.
- 517 46. Krogh A, Larsson B, von Heijne G, Sonnhammer EL. 2001. Predicting transmembrane  
518 protein topology with a hidden markov model: application to complete genomes. *J Mol*  
519 *Biol* 305:567–580.
- 520 47. Käll L, Krogh A, Sonnhammer ELL. 2004. A Combined Transmembrane Topology and  
521 Signal Peptide Prediction Method. *J Mol Biol* 338:1027–1036.
- 522 48. Drozdetskiy A, Cole C, Procter J, Barton GJ. 2015. JPred4: a protein secondary structure  
523 prediction server. *Nucleic Acids Res* 43:W389–W394.
- 524 49. Samsudin F, Ortiz-Suarez ML, Piggot TJ, Bond PJ, Khalid S. 2016. OmpA: A Flexible  
525 Clamp for Bacterial Cell Wall Attachment. *Structure* 24:2227–2235.
- 526 50. Grizot S, Buchanan SK. 2004. Structure of the OmpA-like domain of RmpM from  
527 *Neisseria meningitidis*. *Mol Microbiol* 51:1027–1037.



- 528 51. De Mot R, Proost P, Van Damme J, Vanderleyden J. 1992. Homology of the root adhesin  
529 of *Pseudomonas fluorescens* OE 28.3 with porin F of *P. aeruginosa* and *P. syringae*. Mol  
530 Gen Genet MGG 231:489–493.
- 531 52. Smith SGJ, Mahon V, Lambert MA, Fagan RP. 2007. A molecular Swiss army knife:  
532 OmpA structure, function and expression. FEMS Microbiol Lett 273:1–11.
- 533 53. LaCourse KD, Peterson SB, Kulasekara HD, Radey MC, Kim J, Mougous JD. 2018.  
534 Conditional toxicity and synergy drive diversity among antibacterial effectors. Nat  
535 Microbiol 3:440–446.
- 536 54. Mariano G, Trunk K, Williams DJ, Monlezun L, Strahl H, Pitt SJ, Coulthurst SJ. 2019. A  
537 family of Type VI secretion system effector proteins that form ion-selective pores. Nat  
538 Commun 10.
- 539 55. Sánchez E, García S, Heredia N. 2010. Extracts of edible and medicinal plants damage  
540 membranes of *Vibrio cholerae*. Appl Environ Microbiol 76:6888–6894.
- 541 56. Ji X, Zou J, Peng H, Stolle A-S, Xie R, Zhang H, Peng B, Mekalanos JJ, Zheng J. 2019.  
542 Alarmone Ap4A is elevated by aminoglycoside antibiotics and enhances their bactericidal  
543 activity. Proc Natl Acad Sci 116:9578 LP – 9585.
- 544 57. Finn RD, Clements J, Eddy SR. 2011. HMMER web server: interactive sequence  
545 similarity searching. Nucleic Acids Res 39:W29–W37.
- 546 58. Fridman CM, Keppel K, Gerlic M, Bosis E, Salomon D. 2020. A comparative genomics  
547 methodology reveals a widespread family of membrane-disrupting T6SS effectors. Nat  
548 Commun 11.
- 549 59. Benarroch JM, Asally M. 2020. The Microbiologist’s Guide to Membrane Potential  
550 Dynamics. Trends Microbiol 28:304–314.
- 551 60. Maloney PC, Kashket ER, Wilson TH. 1974. A protonmotive force drives ATP synthesis  
552 in bacteria. Proc Natl Acad Sci U S A 71:3896–3900.
- 553 61. Strahl H, Hamoen LW. 2010. Membrane potential is important for bacterial cell division.  
554 Proc Natl Acad Sci 107:12281 LP – 12286.
- 555 62. Peraro MD, Van Der Goot FG. 2016. Pore-forming toxins: Ancient, but never really out of  
556 fashion. Nat Rev Microbiol 14:77–92.
- 557 63. Hinds MG, Zhang W, Anderluh G, Hansen PE, Norton RS. 2002. Solution structure of the  
558 eukaryotic pore-forming cytolysin equinatoxin II: implications for pore formation. J Mol  
559 Biol 315:1219–1229.
- 560 64. Cascales E, Buchanan SK, Duché D, Kleanthous C, Lloubès R, Postle K, Riley M, Slatin  
561 S, Cavard D. 2007. Colicin Biology. Microbiol Mol Biol Rev 71:158–229.
- 562 65. Yamashita K, Kawai Y, Tanaka Y, Hirano N, Kaneko J, Tomita N, Ohta M, Kamio Y,  
563 Yao M, Tanaka I. 2011. Crystal structure of the octameric pore of staphylococcal  $\gamma$ -  
564 hemolysin reveals the  $\beta$ -barrel pore formation mechanism by two components. Proc Natl  
565 Acad Sci U S A 108:17314–17319.

- 566 66. Savva CG, Da Costa SPF, Bokori-Brown M, Naylor CE, Cole AR, Moss DS, Titball RW,  
567 Basak AK. 2013. Molecular architecture and functional analysis of NetB, a pore-forming  
568 toxin from *Clostridium perfringens*. *J Biol Chem* 288:3512–3522.
- 569 67. Mueller M, Grauschopf U, Maier T, Glockshuber R, Ban N. 2009. The structure of a  
570 cytolytic  $\alpha$ -helical toxin pore reveals its assembly mechanism. *Nature* 459:726–730.
- 571 68. Song L, Hobaugh MR, Shustak C, Cheley S, Bayley H, Gouaux JE. 1996. Structure of  
572 Staphylococcal  $\alpha$ -Hemolysin, a Heptameric Transmembrane Pore. *Science* 274:1859 LP –  
573 1865.
- 574 69. Maharjan S, Saleem M, Feavers IM, Wheeler JX, Care R, Derrick JP. 2016. Dissection of  
575 the function of the RmpM periplasmic protein from *Neisseria meningitidis*. *Microbiol*  
576 162:364–375.
- 577 70. Yoh M, Matsuyama J, Ohnishi M, Takagi K, Miyagi H, Mori K, Park KS, Ono T, Honda  
578 T. 2005. Importance of *Providencia* species as a major cause of travellers' diarrhoea. *J*  
579 *Med Microbiol* 54:1077–1082.
- 580 71. Endimiani A, Luzzaro F, Brigante G, Perilli M, Lombardi G, Amicosante G, Rossolini  
581 GM, Toniolo A. 2005. *Proteus mirabilis* bloodstream infections: Risk factors and  
582 treatment outcome related to the expression of extended-spectrum  $\beta$ -lactamases.  
583 *Antimicrob Agents Chemother* 49:2598–2605.
- 584 72. Dzeing-Ella A, Szwebel TA, Loubinoux J, Coignard S, Bouvet A, Le Jeune C, Aslangul  
585 E. 2009. Infective endocarditis due to *Citrobacter koseri* in an immunocompetent adult. *J*  
586 *Clin Microbiol* 47:4185–4186.
- 587 73. Abbott SL, Janda JM. 1994. Isolation of *Yokenella regensburgei* ('*Koserella trabulsii*')  
588 from a patient with transient bacteremia and from a patient with a septic knee. *J Clin*  
589 *Microbiol* 32:2854–2855.
- 590 74. Di Martino ML, Ek V, Hardt WD, Eriksson J, Sellin ME. 2019. Barcoded consortium  
591 infections resolve cell type-dependent *Salmonella enterica* serovar Typhimurium entry  
592 mechanisms. *MBio* 10:1–15.
- 593 75. Frans I, Michiels CW, Bossier P, Willems KA, Lievens B, Rediers H. 2011. *Vibrio*  
594 *anguillarum* as a fish pathogen: virulence factors, diagnosis and prevention. *J Fish Dis*  
595 34:643–661.
- 596 76. Ciche TA, Ensign JC. 2003. For the insect pathogen *Photorhabdus luminescens*, which  
597 end of a nematode is out? *Appl Environ Microbiol* 69:1890–1897.
- 598 77. Bellieny-Rabelo D, Tanui CK, Miguel N, Kwenda S, Shyntum DY, Moleleki LN. 2019.  
599 Transcriptome and Comparative Genomics Analyses Reveal New Functional Insights on  
600 Key Determinants of Pathogenesis and Interbacterial Competition in *Pectobacterium* and  
601 *Dickeya* spp. *Appl Environ Microbiol* 85:1–20.
- 602 78. Russell AB, Hood RD, Bui NK, LeRoux M, Vollmer W, Mougous JD. 2011. Type VI  
603 secretion delivers bacteriolytic effectors to target cells. *Nature* 475:343–347.
- 604 79. Skorupski K, Taylor RK. 1996. Positive selection vectors for allelic exchange. *Gene*



- 605 169:47–52.
- 606 80. Marvig RL, Blokesch M. 2010. Natural transformation of *Vibrio cholerae* as a tool -  
607 Optimizing the procedure. BMC Microbiol 10:155.
- 608 81. Watve SS, Bernardy EE, Hammer BK. 2014. *Vibrio cholerae*: Measuring natural  
609 transformation frequency. Curr Protoc Microbiol 2014:6A.4.1-6A.4.12.
- 610 82. HMMER: biosequence analysis using profile hidden Markov modelsv. 3.1b2.
- 611 83. Edgar RC. 2004. MUSCLE: Multiple sequence alignment with high accuracy and high  
612 throughput. Nucleic Acids Res 32:1792–1797.
- 613 84. Guindon S, Dufayard J-F, Lefort V, Anisimova M, Hordijk W, Gascuel O. 2010. New  
614 Algorithms and Methods to Estimate Maximum-Likelihood Phylogenies: Assessing the  
615 Performance of PhyML 3.0. Syst Biol 59:307–321.
- 616 85. Lefort V, Longueville JE, Gascuel O. 2017. SMS: Smart Model Selection in PhyML. Mol  
617 Biol Evol 34:2422–2424.
- 618 86. Lemoine F, Correia D, Lefort V, Doppelt-Azeroual O, Mareuil F, Cohen-Boulakia S,  
619 Gascuel O. 2019. NGPhylogeny.fr: New generation phylogenetic services for non-  
620 specialists. Nucleic Acids Res 47:W260–W265.

621

## 622 **ACKNOWLEDGEMENTS**

623 We thank Dr. Jacob Thomas, Dr. Mackenzie Martin, Dr. Athéna Patterson-Orazem, Dr. Dustin  
624 Huard and Tong Yu for advice, experimental help and useful discussions.

625 BKH would also like to thank funding from the Georgia Institute of Technology School of  
626 Biological Sciences, NSF (MCB 1149925 and BMAT-2003721) and BSF (2015103). GS would  
627 like to thank the German National Academy of Natural Sciences Leopoldina (LDPS 2017-03).

628

## 629 **COMPETING INTERESTS**

630 The authors declare no competing interests.

631

## 632 **SUPPLEMENTARY FILES LEGENDS**

633 **Supplementary Figure 1. TpeV Phobius transmembrane helix prediction.**

634 **Supplementary Figure 2. TpeV SignalP prediction.**

635 **Supplementary Figure 3. TpiV SignalP prediction.**

- 636 **Supplementary Table 1. Complete list of all identified TpeV homologs using the PHMMER**  
637 **algorithm.**
- 638 **Supplementary Table 2. Strains and plasmids used in this study.**
